# Supplementary material
Source: PubMed Central journal article supplement (PMC3403099)
Supplement: supp_139.16.2866_DEV078519TablesS1-S10.pdf [file supp_139.16.2866_DEV078519TablesS1-S10.pdf]

**Table S1. Components for knockout serum replacer medium (KSR medium) (500 ml)**

| <b>Component</b>        | <b>Supplier</b> | <b>Catalogue number</b> | <b>Stock Concentration</b> | <b>Final concentration</b> | <b>Volume used</b> |
|-------------------------|-----------------|-------------------------|----------------------------|----------------------------|--------------------|
| Advanced DMEM/F12       | Invitrogen      | 12634010                | -                          | 78%                        | 400 ml             |
| Knockout serum replacer | Invitrogen      | 10828028                | -                          | 20%                        | 100 ml             |
| L-glutamine             | Sigma           | 25030024                | 200 mM                     | 2 mM                       | 5 ml               |
| $\beta$ mercaptoethanol | Sigma           | M6250                   | 14.3 M                     | 0.1 mM                     | 3.5 $\mu$ l        |
| Penicillin/streptomycin | Sigma           | 15140-122               | 100%                       | 1%                         | 5 ml               |

**Table S2. Components for XEN cell maintenance medium**

| <b>Component</b>        | <b>Supplier</b> | <b>Catalogue number</b> | <b>Stock concentration</b> | <b>Final concentration</b> | <b>Volume used</b> |
|-------------------------|-----------------|-------------------------|----------------------------|----------------------------|--------------------|
| RPMI 1640               | Invitrogen      | 61870-010               | -                          | 85%                        | 500 ml             |
| Fetal bovine serum      | Bioserum        | S1818                   | -                          | 13%                        | 75 ml              |
| L-glutamine             | Sigma           | 25030024                | 200 mM                     | 2 mM                       | 5.75 ml            |
| $\beta$ mercaptoethanol | Sigma           | M6250                   | 14.3 M                     | 0.1 mM                     | 4 $\mu$ l          |
| Penicillin/streptomycin | Sigma           | 15140-122               | 100%                       | 1%                         | 5.75 ml            |

Modified from Kunath et al. (Kunath et al., 2005) (500 ml)

**Table S3. Components for EpiSCs maintained in chemically defined medium with bovine serum albumin (CDM - BSA medium) (500 ml)**

| <b>Component</b>                           | <b>Supplier</b>    | <b>Catalogue number</b> | <b>Stock concentration</b> | <b>Final concentration</b> | <b>Volume used</b> |
|--------------------------------------------|--------------------|-------------------------|----------------------------|----------------------------|--------------------|
| Ham's F12                                  | Invitrogen         | 31765027                | -                          | 49% (v/v)                  | 250 ml             |
| Iscove's modified Dulbecco's medium (IMDM) | Invitrogen         | 21980032                | -                          | 49% (v/v)                  | 250 ml             |
| BSA                                        | Europa Bioproducts | Batch A                 | -                          | 5 mg/ml                    | 2.5 g              |
| Chemically defined lipid                   | Invitrogen         | 11905031                | 100x                       | 1×                         | 5 ml               |
| Insulin                                    | Roche              | 1376497                 | 10 mg/ml                   | 7 µg/ml                    | 350 µl             |
| Transferrin                                | Roche              | 652202                  | 30 mg/ml                   | 15 µg/ml                   | 250 µl             |
| Monothioglycerol                           | Sigma              | Sigma M6145             | 11.5 M                     | 450 µM                     | 20 µl              |
| Penicillin/streptomycin                    | Sigma              | 15140-122               | 100%                       | 1%                         | 5 ml               |

**Table S4. Primers used for quantitative RT-PCR analysis**

| Name             | Forward primer                          | Reverse primer               |
|------------------|-----------------------------------------|------------------------------|
| <i>Gata4</i>     | CATCAAATCGCAGCCT                        | AAGCAAGCTAGAGTCCT            |
| <i>Gata6</i>     | ACCATCACCCGACCTACTCG                    | CGACAGGTCCTCCAACAGGT         |
| <i>Sox7</i>      | CAAGGATGAGAGGAAACGTCTG                  | TCATCCACATAGGGTCTCTTCTG      |
| <i>Sox17</i>     | GGAATCCAACCAGCCCACTG                    | GGACACCACGGAGGAAATGG         |
| <i>Pdgfra</i>    | CCTCAGCGAGATAGTGGAGAAC                  | ACCGATGTACGCATTATCAGAGT      |
| <i>Sparc1</i>    | AGGGCCTGGATCTTCTTTCTC                   | CAAATTCTCCCATTTCCACCT        |
| <i>Lama1</i>     | AGGTCTGCGTTGAGTGTTCTG                   | CAGTACTATGCCGTCAGCGAT        |
| <i>Lamb1</i>     | CAGAAATGCAGACGATGTAAAGAA                | GGCATCTGCTGACTCTTCAGT        |
| <i>tPA(Plat)</i> | CTGACTGGACAGAGTGTGAGC                   | ACAGATGCTGTGAGGTGCAG         |
| <i>Hnf4a</i>     | CGAACAGATCCAGTTCATCAAG                  | ATGTGTTCTTGCATCAGGTGAG       |
| <i>Dkk1</i>      | TACAATGATGGCTCTCTGCAGCCT                | TGGTCAGAGGGCATGCATATTCCA     |
| <i>Afp</i>       | AGCTGACAACAAGGAGGAGTG                   | TTAATAATGGTTGTTGCCTGGA       |
| <i>Gapdh</i>     | AATGGAATACGGCTACAGC                     | GTGCAGCGAACTTTATTG           |
| <i>Dab2</i>      | GGCAACAGGCTGAACCATTAGT                  | TTGGTGTCTGATTTTCTAGAGTTTAGAT |
| <i>Nanog</i>     | AGCAGATGCAAGAACTCTCCTC                  | AAGTTGGGTTGGTCCAAGTCT        |
| <i>Oct4</i>      | AGAAGTCCCAGGACATCAAA                    | TGCTTTGCATATCTCCTGAA         |
| <i>Sox2</i>      | TAGAGCTAGACTCCGGGCGATGA                 | TTGCCTTAAACAAGACCACGAAA      |
| <i>Col4a1</i>    | GGTCCTGTCTGGAAGAGTTT                    | AAATACAATGGGAGGGAGAA         |
| <i>Pdx1</i>      | AGTGGGCAGGAGGTGCTTAC                    | ACCCTCAGACTGCTGTCTCTC        |
| <i>Nkx2.5</i>    | CAGCAACTTCGTGAACCTTTGGC                 | AATCTGAGGGACAGGGCATAGTGG     |
| <i>Sox1</i>      | Mm_Sox1_1_SG Quantitect primers assays* |                              |
| <i>Olig3</i>     | CGTCTGAACTCGGTCTCCTC                    | GTTCAGGTCGTGCATCCTCT         |
| <i>Smmhc</i>     | ACATGGCTTCCAGTGTCTCC                    | CTTCTACTACCTGCTCGCCG         |
| <i>Sma</i>       | CGCTGTCAGGAACCCTGAGA                    | CGAAGCCGGCCTTACAGA           |
| <i>Sm22a</i>     | GCAGTTGGCTGTCTGTGAAG                    | AACGATGGAAACTACCGTGG         |
| <i>Apoe</i>      | GTGGGCCGTGCTGTTGGTCA                    | AGACAGCGTCTGCACCCAGC         |
| <i>Ihh</i>       | AGATCGCGCGCAGCTCTGAG                    | CTCCACTGCTAAGCGCGCCA         |
| <i>Cited1</i>    | CTGGCGGCATCAACTGCCAC                    | CAGTAGCCGCAGCCCCTTGG         |

\*This primer mix is purchased from Qiagen.

**Table S5. Antibodies used for immunohistochemistry and flow cytometry**

| <b>Primary antibody</b>           | <b>Supplier</b>         | <b>Catalogue number</b> | <b>Species</b> | <b>Dilution used</b> |
|-----------------------------------|-------------------------|-------------------------|----------------|----------------------|
| Dab2                              | Santa Cruz Biotech      | SC-13982                | Rabbit         | 1:500                |
| Gata4                             | Santa Cruz Biotech      | SC-9053                 | Rabbit         | 1:500                |
| Gata6                             | R&D                     | AF1700                  | Goat           | 1:500                |
| Laminin                           | Abcam                   | Ab16048                 | Rabbit         | 1:500                |
| Nanog                             | Cosmo Bio               | REC-RCAB0002P-F         | Rabbit         | 1:500                |
| Oct4                              | Santa Cruz Biotech      | SC-5279                 | Mouse          | 1:500                |
| Sox7                              | R&D                     | MAB2766                 | Goat           | 1:500                |
| Sox17                             | R&D                     | AF1924                  | Goat           | 1:500                |
| Sparc1                            | Santa Cruz Biotech      | SC-25574                | Goat           | 1:500                |
| SSEA-1                            | BD Pharma               | 560079                  | Mouse          | 1:500                |
| <b>Secondary antibody</b>         | <b>Supplier</b>         | <b>Catalogue number</b> | <b>Species</b> | <b>Dilution used</b> |
| Alexa Fluor 568 anti - mouse IgG  | Invitrogen              | A10037                  | Donkey         | 1:300                |
| Alexa Fluor 568 anti - rabbit IgG | Invitrogen              | A10042                  | Donkey         | 1:300                |
| Alexa Fluor 568 anti - goat IgG   | Invitrogen              | A10057                  | Donkey         | 1:300                |
| APC-AffiniPure Anti-Mouse IgM     | Jackson Immuno Research | 115-136-075             | Goat           | 1:500                |

**Table S6. Testing the requirement and dose of RA and activin for cXEN derivation**

|                  | No activin      |                | 5 ng/ml activin |                 | 10 ng/ml activin |                 | 20 ng/ml activin |                  |
|------------------|-----------------|----------------|-----------------|-----------------|------------------|-----------------|------------------|------------------|
|                  | +F/H            | -F/H           | +F/H            | -F/H            | +F/H             | -F/H            | +F/H             | -F/H             |
| 0 $\mu$ M RA     | 9.6 $\pm$ 0.0   | 9.3 $\pm$ 1.4  | 9.0 $\pm$ 0.7   | 9.9 $\pm$ 0.3   | 7.5 $\pm$ 1.8    | 6.9 $\pm$ 0.7   | 8.4 $\pm$ 1.5    | 8.9 $\pm$ 0.6    |
| 0.001 $\mu$ M RA | 10.1 $\pm$ 4.1  | 14.1 $\pm$ 2.2 | 10.3 $\pm$ 2.7  | 15.7 $\pm$ 3.7  | 10.6 $\pm$ 1.9   | 13.4 $\pm$ 4.7  | 8.3 $\pm$ 1.7    | 13.5 $\pm$ 1.9   |
| 0.01 $\mu$ M RA  | 18.5 $\pm$ 6.0  | 27.2 $\pm$ 2.8 | 19.0 $\pm$ 9.9  | 22.8 $\pm$ 18.8 | 27.6 $\pm$ 12.7  | 40.3 $\pm$ 8.9  | 28.1 $\pm$ 14.2  | 34.67 $\pm$ 11.7 |
| 0.1 $\mu$ M RA   | 19.2 $\pm$ 13.0 | 26.3 $\pm$ 7.0 | 20.8 $\pm$ 14.3 | 31.2 $\pm$ 3.5  | 29.1 $\pm$ 14.8  | 37.0 $\pm$ 9.1  | 24.1 $\pm$ 15.9  | 33.9 $\pm$ 7.4   |
| 1 $\mu$ M RA     | 20.9 $\pm$ 14.1 | 27.1 $\pm$ 6.7 | 24.2 $\pm$ 12.1 | 32.8 $\pm$ 2.5  | 30.6 $\pm$ 15.0  | 38.1 $\pm$ 10.0 | 28.2 $\pm$ 10.2  | 37.9 $\pm$ 7.8   |
| 10 $\mu$ M RA    | 22.7 $\pm$ 13.7 | 27.8 $\pm$ 8.9 | 23.2 $\pm$ 15.0 | 33.7 $\pm$ 8.9  | 24.3 $\pm$ 13.7  | 32.3 $\pm$ 8.4  | 22.4 $\pm$ 13.2  | 33.3 $\pm$ 5.9   |
| 100 $\mu$ M RA   | 23.9 $\pm$ 3.1  | 14.4 $\pm$ 4.0 | 28.0 $\pm$ 8.5  | 26.4 $\pm$ 9.7  | 22.1 $\pm$ 6.2   | 27.6 $\pm$ 6.4  | 25.3 $\pm$ 7.3   | 21.5 $\pm$ 8.5   |

*Sox17::GFP* reporter cell lines were used to assay for the presence or absence of XEN-like cells. Percentage expression was determined by flow cytometry and the data are the mean percent of *Sox17::GFP*-high expressing cells  $\pm$  s.e.m. of technical replicates ( $n=3$ ).  $\pm 24$  ng/ml of FGF2 (F) and 1  $\mu$ g/mL heparin (H) in standard XEN media.

**Table S7. Testing the requirement for exogenous FGF2 and heparin or MEFs for cXEN derivation from *Fgf4*<sup>+/+</sup>, *Fgf4*<sup>+/-</sup> and *Fgf4*<sup>-/-</sup> mESCs**

| Day 6             |                           |           |           |                             |           |           |                             |           |           |                              |           |   |
|-------------------|---------------------------|-----------|-----------|-----------------------------|-----------|-----------|-----------------------------|-----------|-----------|------------------------------|-----------|---|
|                   | + Exogenous FGF2/H, +MEFs |           |           | + Exogenous FGF2/H, no MEFs |           |           | No exogenous FGF2/H, + MEFs |           |           | No exogenous FGF2/H, no MEFs |           |   |
|                   | +/+                       | +/-       | -/-       | +/+                         | +/-       | -/-       | +/+                         | +/-       | -/-       | +/+                          | +/-       |   |
| <b>Sox7-high</b>  | 43.3±4.25                 | 32.3±22.6 | 27.6±13.4 | 41.4±17.1                   | 20.0±17.5 | 25.7±11.2 | 47.1±14.8                   | 24.7±23.9 | 13.5±21.8 | 34.0±13.6                    | 23.5±23.8 | 0 |
| <b>Nanog-high</b> | 0.0± 0.0                  | 4.3± 7.4  | 0.0± 0.0  | 0.0± 0.0                    | 4.1± 8.0  | 3.5± 7.8  | 0.0± 0.0                    | 11.7±14.8 | 10.5±11.5 | 0.0± 0.0                     | 8.9± 12.5 | 3 |

Percentage of Sox7- or Nanog-high-expressing cells observed as a proportion of total DAPI nuclear staining following immunofluorescence analysis 6 days after initiation of cXEN derivation. +/+, +/- and -/- represent *Fgf4*<sup>+/+</sup>, *Fgf4*<sup>+/-</sup> and *Fgf4*<sup>-/-</sup> cell lines, respectively. Data are mean±s.e.m. of *n*=5 separate counts for *Fgf4*<sup>+/+</sup> and *Fgf4*<sup>-/-</sup> mESCs, and 10 separate counts for *Fgf4*<sup>+/-</sup> mESCs. Cells cultured in standard XEN media +/- 24 ng/ml of FGF2 and 1 µg/ml heparin (H) in the presence or absence of mouse embryonic fibroblasts (MEFs) as indicated.

**Table S8. FGF/ERK signalling inhibition during cXEN derivation**

|                   | <b>DMSO</b> | <b>SU5402</b> | <b>PD0325901</b> | <b>PD173074</b> |
|-------------------|-------------|---------------|------------------|-----------------|
| <b>Gata6-high</b> | 18.2 ± 7.1  | 12.3 ± 3.5    | 3.1 ± 2.6        | 6.8 ± 5.2       |
| <b>Sox7-high</b>  | 13.1 ± 7.0  | 11.3 ± 11.4   | 1.9 ± 1.7        | 5.9 ± 7.7       |
| <b>Nanog-high</b> | 0           | 2.7 ± 3.1     | 25.2 ± 0.4       | 9.0 ± 9.1       |
| <b>Oct4-high</b>  | 2.0 ± 3.3   | 2.4 ± 1.9     | 37.6 ± 1.9       | 13.7 ± 12.1     |

Percentage of Sox7-, Gata6-, Oct4- or Nanog-high-expressing cells observed as a proportion of total DAPI nuclear staining following immunofluorescence analysis 3 days after initiation of cXEN derivation in the absence of FGF and heparin. Wild-type cells were grown in standard XEN media supplemented with 10 µL DMSO (control), 10 µM SU5402, 5 µM PD0325901 or 1 µM PD173074. Data are mean±s.e.m. of  $n=3$  biological replicates and  $n=5$  technical replicates.

Table S9. mESCs (from serum or 2i and LIF) converted to cXEN cells

| Genotype of the cell line:                                | cXEN cells? | Fluorescent cXEN?      |
|-----------------------------------------------------------|-------------|------------------------|
| Wild-type line 1                                          | +           | n/a                    |
| Wild-type line 2                                          | +           | n/a                    |
| Wild-type line 3                                          | +           | n/a                    |
| <i>CAG::H2B-GFP</i>                                       | +           | -                      |
| <i>CAG::YFP</i>                                           | +           | -                      |
| <i>Sox17<sup>GFP/+</sup> UbiC::dTomato</i>                | +           | +                      |
| <i>Sox17<sup>GFP/+</sup></i>                              | +           | +                      |
| <i>AFP::GFP</i>                                           | +           | + (in BMP4 conditions) |
| <i>Pdgfra<sup>H2B-GFP/+</sup></i>                         | +           | +                      |
| <i>Pdgfra<sup>H2B-GFP/H2B-GFP</sup></i>                   | -           | n/a                    |
| <i>Fgf4<sup>+/-</sup></i> line 1                          | +           | n/a                    |
| <i>Fgf4<sup>+/-</sup></i> line 2                          | +           | n/a                    |
| <i>Fgf4<sup>-/-</sup></i> line 1                          | +           | n/a                    |
| <i>Fgf4<sup>-/-</sup></i> line 2                          | +           | n/a                    |
| <i>Sox17<sup>-/-</sup></i>                                | -           | n/a                    |
| <i>Gata6<sup>-/-</sup></i>                                | -           | n/a                    |
| <i>Gata4<sup>-/-</sup></i>                                | -           | n/a                    |
| <i>Gata4<sup>-/-</sup></i> and <i>Gata6<sup>-/-</sup></i> | -           | n/a                    |
| <i>Nanog</i> overexpression                               | -           | n/a                    |
| Wild-type (from 2i and LIF) line 1                        | +           | n/a                    |
| Wild-type (from 2i and LIF) line 2                        | +           | n/a                    |
| Wild-type (from 2i and LIF) line 3                        | +           | n/a                    |

**Table S10. Embryoid body chimeras**

|                      | <i>UbiC::dTomato</i><br>mESC | <i>UbiC::dTomato</i><br>cXEN cell | <i>CAG::GFP</i><br>eXEN cell |
|----------------------|------------------------------|-----------------------------------|------------------------------|
| <b>EBs generated</b> | 42                           | 84                                | 42                           |
| <b>Incorporation</b> | 20                           | 23                                | 11                           |
| <b>Interior</b>      | 20                           | n/a                               | 1                            |
| <b>Periphery</b>     | 18                           | 23                                | 10                           |

Single *UbiC::dTomato* mESCs, *UbiC::dTomato* cXEN or *CAG::GFP* embryo-derived XEN cells were aggregated together with 200 wild-type mESCs to form embryoid bodies using the hanging drop technique. After 5 days, embryoid bodies were collected, stained with Hoechst nuclear dye and imaged on a confocal microscope. Contribution of the fluorescently labelled cells to the interior and/or periphery of chimera embryoid bodies was quantified.
